# Supplementary material
Source: publisher site journal article supplement (https://www.dovepress.com/article/394414)
Supplement: Supplementary file 1 [file get_supplementary_file.php]

**Supplemental information: The Association between Metabolic Dysfunction associated Fatty Liver Disease and Peripheral Arterial Disease in the Chinese Population**

**Supplemental Table list:**

**Table S1. Baseline Characteristics of participants according to the number of MD in the cross-sectional study**

**Table S2. Baseline Characteristics of participants according to the presence of MAFLD in the cohort study**

**Table S3. Baseline Characteristics of participants according to the number of MD in the cohort study**

**Table S4. Risks of the incident PAD in association with MAFLD in subgroups**

**Table S5. Trend test for cross-sectional analysis**

**Table S6. Trend test for the cohort analysis**

**Table S7. Sensitivity Test II for PAD in cohort study after further adjusting FIB-4**

**Table S8. Sensitivity Test III for PAD in cross-sectional study with grouping according to the number of metabolic dysregulation.**

**Table S9. Sensitivity Test IV for PAD in cohort study with grouping according to the number of metabolic dysregulation.**

**Table S10. Sensitivity Test V for PAD in subgroup cross-sectional study with grouping according to the number of metabolic dysregulation.**

**Table S11. Sensitivity Test VI for PAD in subgroup cohort study with grouping according to the number of metabolic dysregulation.**

**Table S12. Sensitivity Test VII for PAD in cross-sectional study after excluded other liver disease**

**Table S13. Sensitivity Test VIII for PAD in cohort study after excluded other liver disease**

**Table S1.** Baseline Characteristics of participants according to the number of MD in the cross-sectional study

| **Characteristics** | **Total** | **Non-**  **MAFLD** | **MAFLD with one MD** | **MAFLD with two MD** | **MAFLD with three MD** | ***P*** value |
| --- | --- | --- | --- | --- | --- | --- |
|  | **N = 101,465** | **N = 49,700** | **N = 9349** | **N = 34,128** | **N = 8288** |
| **Demographics** | | | | | | |
| Age (year, mean (SD)) | 49.8(10.0) | 49.1(11.0) | 49.5(9.0) | 50.2(8.9) | 52.9(8.6) | <0.001 |
| Gender, male, n(n%) | 66235(65.3) | 24813(49.9) | 7212(77.1) | 27278(79.9) | 6932(83.6) | <0.001 |
| BMI (kg/m2, mean (SD)) | 24.9(3.4) | 22.8(2.6) | 25.1(2.4) | 27.2(2.6) | 27.7(2.9) | <0.001 |
| WC (cm, mean (SD)) | 86.8(10.7) | 80.1(8.7) | 86.7(6.9) | 93.8(7.7) | 96.1(8.2) | <0.001 |
| SBP (mmHg, mean (SD)) | 122.3(18.1) | 117.3(17.3) | 118.1(14.2) | 128.1(17.1) | 133.5(18.0) | <0.001 |
| DBP (mmHg, mean (SD)) | 77.7(11.6) | 74.2(10.6) | 75.4(9.2) | 82.0(11.4) | 83.9(11.7) | <0.001 |
| **Laboratory examination** | | | | | | |
| FBG (mmol/L, mean (SD)) | 5.6(1.4) | 5.2(1.0) | 5.2(0.8) | 5.6(1.0) | 8.2(2.4) | <0.001 |
| TC (mmol/L, mean (SD)) | 4.9(1.0) | 4.8(0.9) | 5.0(0.9) | 5.0(1.0) | 5.0(1.2) | <0.001 |
| TG (mmol/L, mean (SD)) | 1.9(1.8) | 1.3(1.1) | 1.6(1.3) | 2.4(2.1) | 3.0(3.0) | <0.001 |
| HDL-c (mmol/L, mean (SD)) | 1.3(0.4) | 1.5(0.4) | 1.3(0.3) | 1.1(0.3) | 1.1(0.3) | <0.001 |
| LDL-c (mmol/L, mean (SD)) | 2.9(0.9) | 2.8(0.8) | 3.0(0.8) | 3.1(0.9) | 3.0(1.0) | <0.001 |
| TBIL (μmol/L, mean (SD)) | 12.6(5.8) | 12.9(5.9) | 13.0(5.6) | 12.3(5.5) | 12.1(5.9) | <0.001 |
| ALT (IU/L, mean (SD)) | 26.1(24.1) | 20.9(22.1) | 27.8(18.5) | 31.6(24.3) | 33.4(32.3) | <0.001 |
| AST (IU/L, mean (SD)) | 21.8(14.6) | 20.5(14.5) | 21.8(11.7) | 22.9(14.0) | 24.0(19.2) | <0.001 |
| Creatinine (μmol/L, mean (SD)) | 68.8(17.3) | 66.5(18.5) | 71.9(14.0) | 71.6(16.1) | 67.8(15.2) | <0.001 |
| LEU (×109/L, mean (SD)) | 6.2(1.8) | 6.0(1.9) | 6.2(1.6) | 6.5(1.7) | 6.6(1.7) | <0.001 |
| RBC (×1012/L, mean (SD)) | 4.8(0.5) | 4.6(0.5) | 4.8(0.5) | 4.9(0.4) | 4.9(0.4) | <0.001 |
| HGB (g/L, mean (SD)) | 144.2(16.0) | 138.8(16.3) | 147.6(13.9) | 149.6(13.8) | 150.2(13.3) | <0.001 |
| PLT (×109/L, mean (SD)) | 218.3(55.6) | 216.3(56.8) | 219.8(53.3) | 221.6(54.4) | 215.0(55.3) | <0.001 |
| FIB-4 (mean (SD)) | 1.1(0.7) | 1.2(0.8) | 1.1(0.6) | 1.0(0.5) | 1.1(0.8) | <0.001 |
| eGFR (mL/ (min·1.73 m2), mean (SD)) | 115.6(25.4) | 117.2(25.9) | 111.6(22.4) | 113.0(24.2) | 121.8(28.7) | <0.001 |
| **Comorbidities** | | | | | | |
| Type 2 diabetes, n(n%) | 11976(11.8) | 2275(4.6) | 172(1.8) | 1241(3.6) | 8288(100.0) | <0.001 |
| Hypertension, n(n%) | 22676(22.4) | 6986(14.1) | 1053(11.3) | 11051(32.4) | 3586(43.4) | <0.001 |
| Dyslipidaemia, n(n%) | 42282(41.7) | 11542(23.2) | 2969(31.8) | 21660(63.5) | 6111(73.8) | <0.001 |
| **subclinical atherosclerosis** | | | | | | |
| PAD, n(n%) | 2516(2.5) | 1100(2.2) | 213(2.3) | 916(2.7) | 287(3.5) | <0.001 |

**Notes:***P* values were calculated by one-way ANOVA for normally distributed variables, as well as the Kruskal-Wallis test for categorical variables.

**Abbreviations:** MAFLD, metabolic dysfunction-associated fatty liver disease; MD, metabolic dysfunction; SD, standard deviation; BMI, body mass index; WC, waist circumference; SBP, systolic blood pressure; DBP, diastolic blood pressure; FBG, fasting blood glucose; TC, total cholesterol; TG, triglycerides; HDL-c, high-density lipoprotein cholesterol; LDL-c, low-density lipoprotein cholesterol; TBIL, total bilirubin; ALT, alanine aminotransferase; AST, aspartate transaminase; LEU, leukocyte count; RBC, red blood cell; HGB, haemoglobin; PLT, platelet count; FIB-4, fibrosis 4 score; eGFR, estimated glomerular filtration rate; PAD, peripheral arterial disease.

**Table S2.** Baseline Characteristics of participants according to the presence of MAFLD in the cohort study

| **Characteristics** | **Total** | **MAFLD** | **Non-MAFLD** | ***P*** value |
| --- | --- | --- | --- | --- |
|  | **N = 6833** | **N = 4282** | **N = 2551** |
| **Demographics** | | | | |
| Age (year, mean (SD)) | 48.1 (7.8) | 48.7 (7.3) | 47.2 (8.4) | <0.001 |
| Gender, male, n(n%) | 4865 (71.2) | 3602 (84.1) | 1263 (49.5) | <0.001 |
| BMI (kg/m2, mean (SD)) | 25.4 (3.3) | 26.9 (2.8) | 23.0 (2.4) | <0.001 |
| WC (cm, mean (SD)) | 88.9 (10.2) | 93.5 (8.1) | 81.0 (8.4) | <0.001 |
| SBP (mmHg, mean (SD)) | 120.5 (17.6) | 124.4 (16.8) | 113.9 (16.9) | <0.001 |
| DBP (mmHg, mean (SD)) | 78.4 (10.9) | 80.8 (10.8) | 74.3 (10.0) | <0.001 |
| **Laboratory examination** | | | | |
| FBG (mmol/L, mean (SD)) | 5.6 (1.3) | 5.9 (1.4) | 5.2 (0.8) | <0.001 |
| TC (mmol/L, mean (SD)) | 4.9 (0.9) | 4.9 (1.0) | 4.8 (0.9) | <0.001 |
| TG (mmol/L, mean (SD)) | 1.9 (1.8) | 2.3 (2.1) | 1.3 (0.9) | <0.001 |
| HDL-c (mmol/L, mean (SD)) | 1.2 (0.3) | 1.1 (0.3) | 1.4 (0.3) | <0.001 |
| LDL-c (mmol/L, mean (SD)) | 3.1 (0.8) | 3.1 (0.8) | 3.0 (0.8) | <0.001 |
| TBIL (μmol/L, mean (SD)) | 11.2 (5.7) | 11.6 (6.0) | 10.7 (5.3) | <0.001 |
| ALT (IU/L, mean (SD)) | 26.6 (27.7) | 30.7 (28.6) | 19.7 (24.7) | <0.001 |
| AST (IU/L, mean (SD)) | 21.5 (17.9) | 22.8 (18.4) | 19.4 (16.9) | <0.001 |
| Creatinine (μmol/L, mean (SD)) | 69.2 (14.5) | 71.1 (13.7) | 65.9 (15.3) | <0.001 |
| LEU (×109/L, mean (SD)) | 6.0 (1.6) | 6.2 (1.7) | 5.6 (1.4) | <0.001 |
| RBC (×1012/L, mean (SD)) | 4.8 (0.5) | 4.9 (0.4) | 4.7 (0.5) | <0.001 |
| HGB (g/L, mean (SD)) | 147.5 (15.2) | 151.5 (12.9) | 140.9 (16.3) | <0.001 |
| PLT (×109/L, mean (SD)) | 218.6 (52.6) | 217.6 (51.2) | 220.2 (54.7) | 0.047 |
| FIB-4 (mean (SD)) | 1.0 (0.5) | 1.0 (0.4) | 1.1 (0.6) | <0.001 |
| eGFR (mL/ (min·1.73 m2), mean (SD)) | 116.1 (23.4) | 115.0 (23.2) | 117.9 (23.5) | <0.001 |
| **Comorbidities** | | | | |
| Type 2 diabetes, n(n%) | 860 (12.6) | 741 (17.3) | 119 (4.7)) | <0.001 |
| Hypertension, n(n%) | 1337 (19.6) | 1070 (25.0) | 267 (10.5) | <0.001 |
| Dyslipidaemia, n(n%) | 3326 (48.7) | 2650 (62.0) | 676 (26.5) | <0.001 |
| Other | | | | |
| Follow-time (year, mean(SD)) | 2.76 (1.36) | 2.77 (1.37) | 2.75 (1.35) | 0.542 |

**Notes:** *P* values were calculated by student’s t-test for normally distributed variables and the Wilcoxon rank-sum test for non-normal distributed variables, as well as the chi-square test or Fisher’s exact test for categorical variables.

**Abbreviations:** MAFLD, metabolic dysfunction-associated fatty liver disease; SD, standard deviation; BMI, body mass index; WC, waist circumference; SBP, systolic blood pressure; DBP, diastolic blood pressure; FBG, fasting blood glucose; TC, total cholesterol; TG, triglycerides; HDL-c, high-density lipoprotein cholesterol; LDL-c, low-density lipoprotein cholesterol; TBIL, total bilirubin; ALT, alanine aminotransferase; AST, aspartate transaminase; LEU, leukocyte count; RBC, red blood cell; HGB, haemoglobin; PLT, platelet count; FIB-4, fibrosis 4 score; eGFR, estimated glomerular filtration rate.

**Table S3.** Baseline Characteristics of participants according to the number of MD in the cohort study

| **Characteristics** | **Total** | **Non-**  **MAFLD** | **MAFLD with one MD** | **MAFLD with two MD** | **MAFLD with three MD** | ***P* value** |
| --- | --- | --- | --- | --- | --- | --- |
|  | **N = 6833** | **N = 2551** | **N = 648** | **N = 2994** | **N = 640** |
| **Demographics** | | | | | | |
| Age (year, mean (SD)) | 48.1 (7.8) | 47.2(8.4) | 48.0(7.1) | 48.4(7.4) | 50.7(6.9) | <0.001 |
| Gender, male, n(n%) | 4865 (71.2) | 1263(49.5) | 533(82.3) | 2512(83.9) | 557(87.0) | <0.001 |
| BMI (kg/m2, mean (SD)) | 25.4 (3.3) | 23(2.4) | 24.8(2.3) | 27.2(2.6) | 27.7(2.8) | <0.001 |
| WC (cm, mean (SD)) | 88.9 (10.2) | 81(8.4) | 87.3(6.7) | 94.2(7.7) | 96.2(8.3) | <0.001 |
| SBP (mmHg, mean (SD)) | 120.5 (17.6) | 113.9(16.9) | 115.6(14.3) | 124.8(16.2) | 131.3(18.1) | <0.001 |
| DBP (mmHg, mean (SD)) | 78.4 (10.9) | 74.3(10.0) | 75.7(9.4) | 81.2(10.6) | 83.8(11.3) | <0.001 |
| **Laboratory examination** | | | | | | |
| FBG (mmol/L, mean (SD)) | 5.6 (1.3) | 5.2(0.8) | 5.2(0.6) | 5.6(0.8) | 8.0(2.2) | <0.001 |
| TC (mmol/L, mean (SD)) | 4.9 (0.9) | 4.8(0.9) | 4.8(0.9) | 5.0(1.0) | 5.0(1.1) | <0.001 |
| TG (mmol/L, mean (SD)) | 1.9 (1.8) | 1.3(0.9) | 1.5(0.8) | 2.4(2.0) | 3.1(3.0) | <0.001 |
| HDL-c (mmol/L, mean (SD)) | 1.2 (0.3) | 1.4(0.3) | 1.3(0.3) | 1.1(0.3) | 1.0(0.3) | <0.001 |
| LDL-c (mmol/L, mean (SD)) | 3.1 (0.8) | 3.0(0.8) | 3.1(0.8) | 3.2(0.8) | 3.1(0.9) | <0.001 |
| TBIL (μmol/L, mean (SD)) | 11.2 (5.7) | 10.7(5.3) | 12.0(5.4) | 11.3(5.0) | 12.1(9.6) | <0.001 |
| ALT (IU/L, mean (SD)) | 26.6 (27.7) | 19.7(24.7) | 26.1(18.4) | 30.6(18.4) | 35.7(59.2) | <0.001 |
| AST (IU/L, mean (SD)) | 21.5 (17.9) | 19.4(16.9) | 21.7(16.5) | 22.4(9.3) | 25.5(39.7) | <0.001 |
| Creatinine (μmol/L, mean (SD)) | 69.2 (14.5) | 65.9(15.3) | 71.7(12.6) | 71.7(13.4) | 67.7(15.5) | <0.001 |
| LEU (×109/L, mean (SD)) | 6.0 (1.6) | 5.6(1.4) | 6.0(1.4) | 6.2(1.8) | 6.4(1.5) | <0.001 |
| RBC (×1012/L, mean (SD)) | 4.8 (0.5) | 4.7(0.5) | 4.9(0.4) | 4.9(0.4) | 5.0(0.4) | <0.001 |
| HGB (g/L, mean (SD)) | 147.5 (15.2) | 140.9(16.3) | 150.0(13.1) | 151.7(12.9) | 152.2(12.8) | <0.001 |
| PLT (×109/L, mean (SD)) | 218.6 (52.6) | 220.2(54.7) | 216.7(48.4) | 219.7(51.9) | 208.8(49.7) | <0.001 |
| FIB-4 mean (SD)) | 1.0 (0.5) | 1.1(0.6) | 1.0(0.5) | 1.0(0.4) | 1.1(0.5) | <0.001 |
| eGFR (mL/ (min·1.73 m2), mean (SD)) | 116.1 (23.4) | 117.9(23.5) | 113.1(21.5) | 113.8(22.6) | 122.7(25.8) | <0.001 |
| **Comorbidities** | | | | | | |
| Type 2 diabetes, n(n%) | 860 (12.6) | 119(4.7)) | 10(1.5) | 91(3.0) | 640(100.0) | <0.001 |
| Hypertension, n(n%) | 1337 (19.6) | 267(10.5) | 55(8.5) | 763(25.5) | 252(39.4) | <0.001 |
| Dyslipidaemia, n(n%) | 3326 (48.7) | 676(26.5) | 214(33.1) | 1938(64.8) | 498(77.9) | <0.001 |

**Notes:** Abbreviations: MAFLD, metabolic dysfunction-associated fatty liver disease; MD, metabolic dysfunction; SD, standard deviation; BMI, body mass index; WC, waist circumference; SBP, systolic blood pressure; DBP, diastolic blood pressure; FBG, fasting blood glucose; TC, total cholesterol; TG, triglycerides; HDL-c, high-density lipoprotein cholesterol; LDL-c, low-density lipoprotein cholesterol; TBIL, total bilirubin; ALT, alanine aminotransferase; AST, aspartate transaminase; LEU, leukocyte count; RBC, red blood cell; HGB, haemoglobin; PLT, platelet count; FIB-4, Fibrosis 4 Score; eGFR, estimated glomerular filtration rate.

*P* values were calculated by one-way ANOVA for normally distributed variables, as well as the Kruskal-Wallis test for categorical variables.

**Table S4.** Risks of the incident PAD in association with MAFLD in subgroups

| **Sub-group** | **HR (95% CI)** | ***P* value** | ***P* for interaction** |
| --- | --- | --- | --- |
| **BMI** | | | |
| <23 | 0.70 (0.16,3.06) | 0.630 | 0.45 |
| ≥23 | 1.52 (1.00,2.32) | 0.050 |  |
| **Diabetes** | | | |
| No | 1.64 (1.13,2.37) | 0.009 | 0.29 |
| Yes | 4.82 (0.64,36.29) | 0.130 |  |
| **D****yslipidemia** | | | |
| No | 1.44 (0.89,2.32) | 0.140 | 0.33 |
| Yes | 1.92 (1.04,3.52) | 0.036 |  |
| **Hypertension** | | | |
| No | 1.61 (1.08,2.41) | 0.020 | 0.90 |
| Yes | 1.51 (0.67,3.42) | 0.320 |  |

**Notes:** The model was adjusted for age, sex, red blood cell, leukocyte count, haemoglobin, platelet count and eGFR. *P* values were calculated based on random-effects Cox proportional hazards model

**Abbreviations:** BMI, body mass index; HR, hazards ratio; CI, confidence interval.

**Table S5.** **Trend test for cross-sectional analysis**

| **Groups** | **Odds ratio (95% confidence interval)** | | | | | |
| --- | --- | --- | --- | --- | --- | --- |
|
| **Crude** | ***P for trend*** | **Model 1** | ***P for trend*** | **Model 2** | ***P for trend*** |
| Non-MAFLD | 1 (reference) | <0.001 | 1 (reference) | <0.001 | 1 (reference) | <0.001 |
| MAFLD with one MD | 1.14 (0.98-1.32) | 1.05 (0.90-1.22) | 1.06 (0.91-1.23) |
| MAFLD with two MD | 1.49 (1.36-1.63) | 1.29 (1.18-1.24) | 1.31 (1.19-1.44) |
| MAFLD with three MD | 2.11 (1.84-2.41) | 1.64 (1.43-1.89) | 1.65 (1.43-1.90) |

Notes: Model 1 the adjustment factors included age, sex; Model 2 the adjustment factors included age, sex, red blood cell, leukocyte count, hemoglobin, platelet count and eGFR.

*P for trend* was calculated based on generalized linear mixed model.

**Table S6. Trend test for the cohort analysis**

| **Groups** | **Hazards ratio (95% confidence interval)** | | | | | |
| --- | --- | --- | --- | --- | --- | --- |
| **Crude** | ***P for trend*** | **Model 1** | ***P for trend*** | **Model 2** | ***P for trend*** |
| Non-MAFLD | 1 (reference) | <0.001 | 1 (reference) | 0.001 | 1 (reference) | 0.001 |
| MAFLD with one MD | 1.44 (0.82-2.50) | 1.34 (0.76-2.37) | 1.31 (0.74-2.31) |
| MAFLD with two MD | 1.80 (1.27-2.56) | 1.69 (1.17-2.44) | 1.64 (1.13-2.38) |
| MAFLD with three MD | 2.46 (1.55-3.92) | 2.23 (1.37-3.63) | 2.27 (1.39-3.71) |

Notes: Model 1 the adjustment factors included age, sex; Model 2 the adjustment factors included age, sex, red blood cell, leukocyte count, hemoglobin, platelet count and eGFR.

*P for trend* was calculated based on random-effects Cox proportional hazards model.

**Table S7.** Sensitivity Test II for PAD in cohort study after further adjusting FIB-4

| **Group** | **HR (95% CI)** | ***P value*** |
| --- | --- | --- |
| Non-MAFLD | 1 (reference) | - |
| MAFLD | 1.67 (1.17,2.38) | 0.005 |
| **Categories by number of metabolic disorders in MAFLD** | | |
| Non-MAFLD | 1 (reference) | - |
| MAFLD with one MD | 1.31 (0.74,2.31) | 0.360 |
| MAFLD with two MD | 1.64 (1.13,2.38) | 0.010 |
| MAFLD with three MD | 2.27 (1.39,3.71) | 0.001 |

**Notes:** The adjustment factors included age, sex, red blood cell, leukocyte count, hemoglobin, platelet count, eGFR and FIB-4.

*P* values were calculated based on random-effects Cox proportional hazards model.

**Abbreviations:** HR, hazards ratio; CI, confidence interval.

**Table S8. Sensitivity Test III for PAD in cross-sectional study with grouping according to the number of metabolic dysregulation.**

| **Groups** | **Odds ratio (95% confidence interval)** | | | | | |
| --- | --- | --- | --- | --- | --- | --- |
| **Crude** | ***P value*** | **Model 1** | ***P value*** | **Model 2** | ***P value*** |
| **Categories by number of metabolic dysregulations in MAFLD** | | | | | | |
| Non-MAFLD or MAFLD without metabolic dysregulation | 1 (reference) | - | 1 (reference) | - | 1 (reference) | - |
| MAFLD with one metabolic dysregulation | 1.21(1.02,1.42) | 0.027 | 1.08(0.91,1.28) | 0.353 | 1.10(0.92,1.30) | 0.292 |
| MAFLD with two metabolic dysregulations | 1.36(1.2,1.53) | <0.001 | 1.17(1.04,1.33) | 0.011 | 1.19(1.05,1.34) | 0.008 |
| MAFLD with three metabolic dysregulations | 1.67(1.49,1.87) | <0.001 | 1.42(1.27,1.59) | <0.001 | 1.43(1.27,1.61) | <0.001 |
| MAFLD with four metabolic dysregulations | 1.63(1.43,1.87) | <0.001 | 1.40(1.22,1.60) | <0.001 | 1.41(1.22,1.62) | <0.001 |
| MAFLD with five metabolic dysregulations | 2.22(1.83,2.69) | <0.001 | 1.90(1.55,2.31) | <0.001 | 1.91(1.56,2.33) | <0.001 |

Notes: Model 1 the adjustment factors included age, sex; Model 2 the adjustment factors included age, sex, red blood cell, leukocyte count, hemoglobin, platelet count and eGFR.

*P* values were calculated based on generalized linear mixed model.

**Table S9. Sensitivity Test IV for PAD in cohort study with grouping according to the number of metabolic dysregulations.**

| **Groups** | **Hazard ratio (95% confidence interval)** | | | | | |
| --- | --- | --- | --- | --- | --- | --- |
| **Crude** | ***P value*** | **Model 1** | ***P value*** | **Model 2** | ***P value*** |
| **Categories by number of metabolic dysregulations in MAFLD** | | | | | | |
| Non-MAFLD or MAFLD without metabolic dysregulation | 1 (reference) | - | 1 (reference) | - | 1 (reference) | - |
| MAFLD with one metabolic dysregulation | 1.27(0.68,2.39) | 0.450 | 1.15(0.60,2.19) | 0.670 | 1.13(0.60,2.16) | 0.700 |
| MAFLD with two metabolic dysregulations | 1.49(0.95,2.34) | 0.084 | 1.38(0.87,2.20) | 0.170 | 1.34(0.84,2.14) | 0.210 |
| MAFLD with three metabolic dysregulations | 1.67(1.11,2.52) | 0.015 | 1.54(1.004,2.36) | 0.048 | 1.50(0.97,2.30) | 0.067 |
| MAFLD with four metabolic dysregulations | 2.29(1.53,3.44) | 0.000 | 2.11(1.38,3.22) | 0.001 | 2.09(1.37,3.21) | 0.001 |
| MAFLD with five metabolic dysregulations | 2.11(1.14,3.88) | 0.017 | 1.92(1.03,3.57) | 0.040 | 1.92(1.03,3.60) | 0.041 |

Notes: Model 1 the adjustment factors included age, sex; Model 2 the adjustment factors included age, sex, red blood cell, leukocyte count, hemoglobin, platelet count and eGFR.

*P* values were calculated based on random-effects Cox proportional hazards model.

**Table S10. Sensitivity Test V for PAD in subgroup cross-sectional study with grouping according to the number of metabolic dysregulations.**

| **Subgroup** | **Groups** | **Odds ratio (95% confidence interval)** | | | |
| --- | --- | --- | --- | --- | --- |
| **Crude** | ***P value*** | **Model 2** | ***P value*** |
| T2DM | Non-MAFLD or MAFLD without metabolic dysregulation | 1 (reference) | - | 1 (reference) | - |
| MAFLD with one metabolic dysregulation | 0.53(0.30,0.93) | 0.029 | 0.59(0.33,1.06) | 0.078 |
| MAFLD with two metabolic dysregulations | 0.94(0.67,1.32) | 0.728 | 1.04(0.74,1.47) | 0.818 |
| MAFLD with three metabolic dysregulations | 1.32(0.98,1.77) | 0.065 | 1.54(1.13,2.09) | 0.006 |
| MAFLD with four metabolic dysregulations | 1.09(0.78,1.52) | 0.618 | 1.30(0.92,1.84) | 0.140 |
| MAFLD with five metabolic dysregulations | 1.57(1.02,2.41) | 0.039 | 1.85(1.19,2.87) | 0.006 |
| non-T2DM | Non-MAFLD or MAFLD without metabolic dysregulation | 1 (reference) | - | 1 (reference) | - |
| MAFLD with one metabolic dysregulation | 1.29(1.08,1.53) | 0.004 | 1.18(0.98,1.40) | 0.075 |
| MAFLD with two metabolic dysregulations | 1.36(1.19,1.56) | <0.001 | 1.20(1.05,1.38) | 0.008 |
| MAFLD with three metabolic dysregulations | 1.59(1.40,1.81) | <0.001 | 1.38(1.21,1.57) | <0.001 |
| MAFLD with four metabolic dysregulations | 1.63(1.40,1.89) | <0.001 | 1.41(1.20,1.64) | <0.001 |
| MAFLD with five metabolic dysregulations | 2.16(1.72,2.71) | <0.001 | 1.87(1.48,2.36) | <0.001 |
| Obesity | Non-MAFLD or MAFLD without metabolic dysregulation | 1 (reference) | - | 1 (reference) | - |
| MAFLD with one metabolic dysregulation | 0.97(0.81,1.15) | 0.723 | 0.96(0.80,1.15) | 0.653 |
| MAFLD with two metabolic dysregulations | 1.12(0.98,1.28) | 0.098 | 1.06(0.92,1.21) | 0.427 |
| MAFLD with three metabolic dysregulations | 1.35(1.19,1.53) | <0.001 | 1.26(1.11,1.43) | <0.001 |
| MAFLD with four metabolic dysregulations | 1.33(1.15,1.54) | <0.001 | 1.24(1.07,1.44) | <0.001 |
| MAFLD with five metabolic dysregulations | 1.77(1.44,2.18) | <0.001 | 1.65(1.34,2.04) | <0.001 |
| Lean/normal weight | Non-MAFLD or MAFLD without metabolic dysregulation | 1 (reference) | - | 1 (reference) | - |
| MAFLD with one metabolic dysregulation | 0.96(0.25,3.73) | 0.953 | 0.72(0.18,2.92) | 0.644 |
| MAFLD with two metabolic dysregulations | 0.93(0.55,1.57) | 0.783 | 0.82(0.48,1.38) | 0.451 |
| MAFLD with three metabolic dysregulations | 1.24(0.69,2.22) | 0.472 | 1.08(0.60,1.93) | 0.808 |
| MAFLD with four metabolic dysregulations | 0.28(0.05,1.69) | 0.164 | 0.24(0.03,1.74) | 0.159 |
| MAFLD with five metabolic dysregulations | 2.91(0.75,11.26) | 0.121 | 2.60(0.63,10.75) | 0.188 |

Notes: Model 2 the adjustment factors included age, sex, red blood cell, leukocyte count, hemoglobin, platelet count and eGFR.

*P* values were calculated based on generalized linear mixed model.

**Table S11. Sensitivity Test VI for PAD in subgroup cohort study with grouping according to the number of metabolic dysregulations.**

| **Subgroup** | **Groups** | **Hazards ratio (95% confidence interval)** | | | |
| --- | --- | --- | --- | --- | --- |
| **Crude** | ***P value*** | **Model 2** | ***P value*** |
| T2DM | Non-MAFLD or MAFLD without metabolic dysregulation | 1 (reference) | - | 1 (reference) | - |
| MAFLD with one metabolic dysregulation | 1.79(0.11,28.80) | 0.68 | 2.01(0.12,33.02) | 0.62 |
| MAFLD with two metabolic dysregulations | 3.67(0.41,32.82) | 0.25 | 4.27(0.47,39.06) | 0.2 |
| MAFLD with three metabolic dysregulations | 5.04(0.64,39.58) | 0.12 | 5.17(0.65,40.98) | 0.12 |
| MAFLD with four metabolic dysregulations | 6.12(0.79,47.42) | 0.083 | 7.09(0.90,56.12) | 0.063 |
| MAFLD with five metabolic dysregulations | 4.89(0.51,47.16) | 0.17 | 6.23(0.62,62.15) | 0.12 |
| non-T2DM | Non-MAFLD or MAFLD without metabolic dysregulation | 1 (reference) | - | 1 (reference) | - |
| MAFLD with one metabolic dysregulation | 1.32(0.68,2.53) | 0.41 | 1.21(0.62,2.37) | 0.57 |
| MAFLD with two metabolic dysregulations | 1.43(0.89,2.30) | 0.14 | 1.3(0.80,2.13) | 0.29 |
| MAFLD with three metabolic dysregulations | 1.49(0.95,2.33) | 0.083 | 1.36(0.85,2.17) | 0.200 |
| MAFLD with four metabolic dysregulations | 2.06(1.32,3.22) | 0.002 | 1.89(1.18,3.02) | 0.008 |
| MAFLD with five metabolic dysregulations | 2.06(1.04,4.07) | 0.037 | 1.92(0.95,3.85) | 0.067 |
| Obesity | Non-MAFLD or MAFLD without metabolic dysregulation | 1 (reference) | - | 1 (reference) | - |
| MAFLD with one metabolic dysregulation | 1.03(0.53,1.99) | 0.940 | 1.01(0.51,1.98) | 0.980 |
| MAFLD with two metabolic dysregulations | 1.24(0.75,2.05) | 0.400 | 1.22(0.74,2.04) | 0.440 |
| MAFLD with three metabolic dysregulations | 1.40(0.88,2.23) | 0.160 | 1.37(0.85,2.20) | 0.190 |
| MAFLD with four metabolic dysregulations | 1.83(1.15,2.9) | 0.011 | 1.85(1.15,2.97) | 0.011 |
| MAFLD with five metabolic dysregulations | 1.70(0.89,3.25) | 0.110 | 1.68(0.87,3.24) | 0.120 |
| Lean/normal weight | Non-MAFLD or MAFLD without metabolic dysregulation | 1 (reference) | - | 1 (reference) | - |
| MAFLD with one metabolic dysregulation | - | 1.000 | - | 1.000 |
| MAFLD with two metabolic dysregulations | 0.93(0.12,6.98) | 0.950 | 0.74(0.10,5.65) | 0.770 |
| MAFLD with three metabolic dysregulations | - | 1.000 | - | 1.000 |
| MAFLD with four metabolic dysregulations | 3.89(0.52,29.11) | 0.190 | 3.85(0.50,29.88) | 0.200 |
| MAFLD with five metabolic dysregulations | - | 1.000 | - | 1.000 |

Notes: Model 2 the adjustment factors included age, sex, red blood cell, leukocyte count, hemoglobin, platelet count and eGFR.

*P* values were calculated based on random-effects Cox proportional hazards model.

**Table S12. Sensitivity Test VII for PAD in cross-sectional study after excluding other liver diseases**

| **Groups** | **Odds ratio (95% confidence interval)** | | | | | |
| --- | --- | --- | --- | --- | --- | --- |
| **Crude** | ***P value*** | **Model 1** | ***P value*** | **Model 2** | ***P value*** |
| Non-MAFLD | 1 (reference) | ***-*** | 1 (reference) | ***-*** | 1 (reference) | ***-*** |
| MAFLD | 1.52 (1.39,1.65) | <0.001 | 1.31 (1.20,1.43) | <0.001 | 1.32 (1.21,1.45) | <0.001 |
| **Categories by number of metabolic disorders in MAFLD** | | | | | | |
| Non-MAFLD | 1 (reference) | - | 1 (reference) | - | 1 (reference) | - |
| MAFLD with one MD | 1.13 (0.97,1.32) | 0.111 | 1.04 (0.89,1.22) | 0.605 | 1.05 (0.90,1.23) | 0.512 |
| MAFLD with two MD | 1.52 (1.38,1.67) | <0.001 | 1.32 (1.20,1.45) | <0.001 | 1.33 (1.21,1.47) | <0.001 |
| MAFLD with three MD | 2.15 (1.87,2.48) | <0.001 | 1.67 (1.45,1.93) | <0.001 | 1.68 (1.45,1.94) | <0.001 |

Notes: Model 1 the adjustment factors included age, sex; Model 2 the adjustment factors included age, sex, red blood cell, leukocyte count, hemoglobin, platelet count and eGFR.

*P* values were calculated based on generalized linear mixed model.

**Table S13. Sensitivity Test VIII for PAD in cohort study after excluding other liver diseases**

| **Groups** | **Hazards ratio (95% confidence interval)** | | | | | |
| --- | --- | --- | --- | --- | --- | --- |
| **Crude** | ***P value*** | **Model 1** | ***P value*** | **Model 2** | ***P value*** |
| Non-MAFLD | 1 (reference) | ***-*** | 1 (reference) | ***-*** | 1 (reference) | ***-*** |
| MAFLD | 1.83(1.31,2.57) | <0.001 | 1.71(1.19,2.45) | 0.004 | 1.65(1.15,2.37) | 0.007 |
| **Categories by number of metabolic disorders in MAFLD** | | | | | | |
| Non-MAFLD | 1 (reference) | - | 1 (reference) | - | 1 (reference) | - |
| MAFLD with one MD | 1.39(0.79,2.47) | 0.260 | 1.31(0.73,2.35) | 0.370 | 1.27(0.71,2.28) | 0.420 |
| MAFLD with two MD | 1.79(1.25,2.55) | 0.002 | 1.68(1.15,2.45) | 0.007 | 1.62(1.11,2.37) | 0.013 |
| MAFLD with three MD | 2.51(1.57,4.02) | 0.000 | 2.29(1.40,3.74) | 0.001 | 2.32(1.41,3.82) | 0.001 |

Notes: Model 1 the adjustment factors included age, sex; Model 2 the adjustment factors included age, sex, red blood cell, leukocyte count, hemoglobin, platelet count and eGFR.

*P* values were calculated based on random-effects Cox proportional hazards model.
